# Supplementary material
Source: HighWire-hosted journal article supplement (https://jama.ama-assn.org/content/suppl/2003/02/13/288.10.1310)

# Síndrome del túnel carpiano

El síndrome del túnel carpiano (STC) es una dolencia provocada por la inflamación y la presión en el interior del "túnel" formado por huesos (huesos del carpo) y un ligamento (ligamento carpiano transverso) en la muñeca. Por el túnel carpiano discurren diversos tendones y el nervio mediano. Los síntomas de este síndrome se deben a la compresión del mencionado nervio.

En el número correspondiente al 11 de septiembre de 2002 de JAMA se incluye un artículo sobre un estudio que comparó 2 tratamientos para el STC: la aplicación de una férula en la muñeca y una intervención quirúrgica para liberar el túnel carpiano.

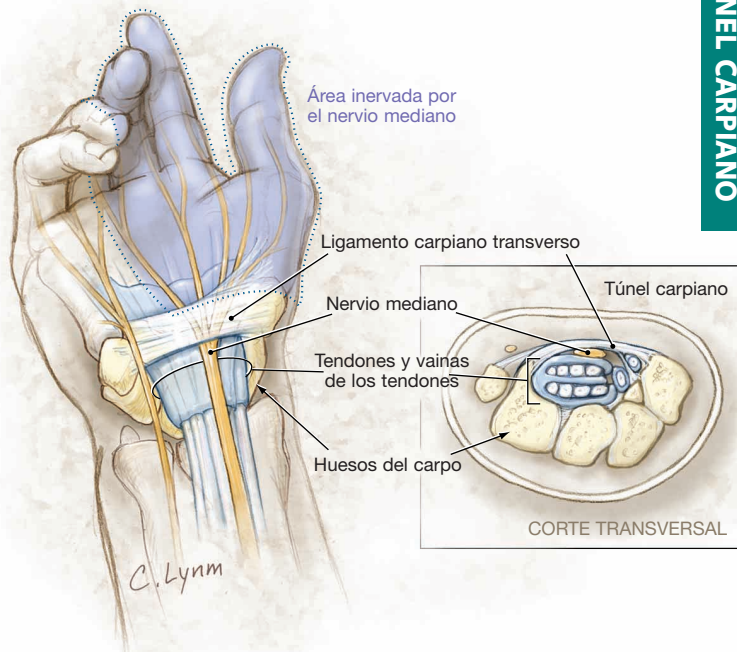

## SÍNTOMAS DEL SÍNDROME DEL TÚNEL CARPIANO

- Dolor y frecuente hormigueo o entumecimiento de los dedos que en ocasiones perturban el sueño.
- Calambres en la mano o la muñeca.
- Sensación de que los dedos se encuentran hinchados, aunque no lo estén.
- Debilidad con dificultad para cerrar el puño o apretar objetos con la mano.
- Los síntomas del STC son variables y con frecuencia se perciben en los dedos pulgar, índice, medio y parte del anular.

## RIESGO DE PRESENTAR UN SÍNDROME DEL TÚNEL CARPIANO

Las personas que escriben a máquina, trabajan en fábricas, utilizan maquinaria que vibra, hacen deportes en los que intervienen movimientos de la mano, tejen o realizan cualquier tipo de movimiento repetitivo con la mano corren riesgo de desarrollar este síndrome. No obstante, en ocasiones no se identifica una causa definitiva y, por otra parte, se han descrito otros muchos factores de riesgo que incluyen:

- Artritis o fractura próxima a la muñeca.
- Lesión de la muñeca que provoca inflamación del túnel carpiano.
- Embarazo.
- Diabetes.
- Enfermedades del tiroides, en especial hipotiroidismo.

## TRATAMIENTO

El tratamiento suele iniciarse con la aplicación de una férula que se utiliza por la noche. Los medicamentos antiinflamatorios alivian el dolor y el entumecimiento. El médico también puede recomendarle una inyección de un corticoide que contribuya a reducir la inflamación. Es importante que haga modificaciones en su trabajo con el objetivo de que, mientras desempeña su labor, su muñeca permanezca en una posición neutra (con la articulación de la muñeca recta y no hacia abajo).

Si sus síntomas de STC son graves o no mejoran con los tratamientos mencionados previamente, su médico le recomendará una **intervención quirúrgica para liberar el túnel carpiano** y eliminar la presión ejercida sobre el nervio mediano. Esta intervención suele llevarse a cabo a través de una incisión en la muñeca o la palma de la mano. Necesitará varios meses para recuperar la fuerza en la mano y la muñeca. Lamentablemente, en algunos casos el STC no siempre se resuelve por completo después de la cirugía.

## PARA MÁS INFORMACIÓN

- American Society for Surgery of the Hand  
Tel.: 847/384-8300.  
[www.assh.org](http://www.assh.org)
- National Institute for Occupational Safety and Health  
Tel.: 800/356-4674.  
[www.cdc.gov/niosh](http://www.cdc.gov/niosh)

## PARA SU PROPIA INFORMACIÓN

Para localizar esta "Página de JAMA para el Paciente" u otras previas, acceda al índice de la "Página para el Paciente" en la web de JAMA ([www.jama.com](http://www.jama.com)). Las "Paginas" están disponibles en inglés y en español. En el número correspondiente al 14 de julio de 1999 se publicó una "Página para el Paciente" sobre síndrome del túnel carpiano.

Fuentes: American Society for Surgery of the Hand, Harvard Medical School's Consumer Health Information, National Institute for Occupational Safety and Health.

Redactora: Sharon Parmet, MS

Diseñador: Cassio Lynn, MA

Editor: Richard M. Glass, MD

La "Página de JAMA para el Paciente" es un servicio público de la revista JAMA. La información y recomendaciones que aparecen en esta página son adecuadas en la mayoría de los casos, pero no constituyen el sustituto de un diagnóstico médico. Para una información más específica sobre su caso particular, la revista JAMA le sugiere que consulte con su médico. Los médicos y otros profesionales de asistencia sanitaria pueden reproducir esta página sin fines comerciales y facilitarla a los pacientes. Cualquier otro tipo de reproducción debe someterse a la aprobación de la AMA. Para adquirir separatas, pueden ponerse en contacto con el teléfono +718/946-7424.

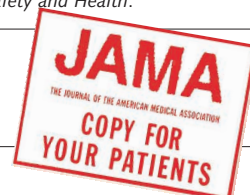

Supplement: pdfpat0911.pdf [file pdfpat0911.pdf]
